# Supplementary material for: An Updated PAH Mutational Spectrum of Phenylketonuria in Mexican Patients Attending a Single Center: Biochemical, Clinical-Genotyping Correlations
Source: MDPI journal article supplement (doi:10.3390/genes12111676), 2021-10-23
Supplement: s1 [file s1]

Supplementary Table S1. PCR oligonucleotides and sequencing conditions for *PAH* gene.

| Name of primer     | Sequence (5'-3')*                          | Size of amplicon (bp)** |
|--------------------|--------------------------------------------|-------------------------|
| M13R-pUC-PAH-EX1F  | CAGGAAACAGCTATGACGCGAGGTAAACCTTCAGCCC      | 300                     |
| M13F-PAH-EX1R      | GTAAAACGACGGCCAGTTGACTTCCTGGATATTCTCATCAGC |                         |
| M13R-pUC-PAH-EX2F  | CAGGAAACAGCTATGACTGTCCATGGAGGTTAACAGGAAT   | 303                     |
| M13F-PAH-EX2R      | GTAAAACGACGGCCAGTTGAGCTCAAATTCAAATCTGCCTG  |                         |
| M13F-PAH-EX3F      | GTAAAACGACGGCCAGTGAACATACTGCCCCACCTCC      | 614                     |
| M13R-pUC-PAH-EX3R  | CAGGAAACAGCTATGACGGTCCCCAACCTATGTCCAC      |                         |
| M13F-PAH-EX4F      | GTAAAACGACGGCCAGTTTGGGGGTATCTGGAAGCC       | 367                     |
| M13R-pUC-PAH-EX4R  | CAGGAAACAGCTATGACTTTCCCAGCCCTCGTGTAAT      |                         |
| M13F-PAH-EX5F      | GTAAAACGACGGCCAGTAGGAGAGCTAAGTTTAACCGAGAC  | 417                     |
| M13R-pUC-PAH-EX5R  | CAGGAAACAGCTATGACCATGTGTTATTAAAGGGAGGGTTT  |                         |
| M13R-pUC-PAH-EX6F  | CAGGAAACAGCTATGACATTCAGTGTAGCAAGTGATGGC    | 515                     |
| M13F-PAH-EX6R      | GTAAAACGACGGCCAGTTGATAAACACAGTAGGGGCTG     |                         |
| M13R-pUC-PAH-EX7F  | CAGGAAACAGCTATGACATGTCCCTGGGCAGTTATGT      | 423                     |
| M13F-PAH-EX7R      | GTAAAACGACGGCCAGTTGGTCTATCTACTTGGATGGAGCAA |                         |
| M13F-PAH-EX8F      | GTAAAACGACGGCCAGTTCCCAACCTCTGCATATCACTT    | 412                     |
| M13R-pUC-PAH-EX8R  | CAGGAAACAGCTATGACCCCATGCTTGATCTCCGAAA      |                         |
| M13F-PAH-EX9F      | GTAAAACGACGGCCAGTTCTGAAGGCATCTGGCCACC      | 260                     |
| M13R-pUC-PAH-EX9R  | CAGGAAACAGCTATGACAGATAACCTGGCTTCCAGGGG     |                         |
| M13R-pUC-PAH-EX10F | CAGGAAACAGCTATGACACTCACATGCCAATCCCCTC      | 380                     |
| M13F-PAH-EX10R     | GTAAAACGACGGCCAGTTGGAGAATGAGTTCCAGGTTG     |                         |
| M13R-pUC-PAH-EX11F | CAGGAAACAGCTATGACAGCATTTGGGCTGTGATGTAGA    | 508                     |
| M13F-PAH-EX11R     | GTAAAACGACGGCCAGTTGTCTTGACTTGGTGGTTGC      |                         |
| M13F-PAH-EX12F     | GTAAAACGACGGCCAGTGCTTCCCAAGAAGACTCATTAAAA  | 432                     |
| M13R-pUC-PAH-EX12R | C                                          |                         |
|                    | CAGGAAACAGCTATGACCATGGCTTACATGGAGGTGCTT    | 358                     |
| M13R-pUC-PAH-EX13F | CAGGAAACAGCTATGACAGCTCCTTGAAAGTTGGGGT      |                         |
| M13F-PAH-EX13R     | GTAAAACGACGGCCAGTTGTAATCATATCCTGTCATTTTCA  |                         |

\*Universal sequencing primers are highlighted (M13F and M13R-pUC).

\*\*Size without universal sequence.
